# Supplementary material for: 2-(3′,4′-Dimethoxybenzylidene)tetralone induces anti-breast cancer activity through microtubule stabilization and activation of reactive oxygen species
Source: Royal Society of Chemistry journal article supplement (doi:10.1039/c6ra02663j), 2016-01-01
Supplement: c6ra02663j1.pdf [file c6ra02663j1.pdf]

## **2-(3', 4'-dimethoxybenzylidene) tetralone induces anti-breast cancer activity through microtubule stabilization and activation of reactive oxygen species**

Yashveer Gautam,<sup>a†</sup> Sonam Dwivedi,<sup>b†</sup> Ankita Srivastava,<sup>a</sup> Hamidullah,<sup>b</sup> Arjun Singh,<sup>a</sup> D. Chanda,<sup>a</sup> Jyotsna Singh,<sup>b</sup> Smita Rai,<sup>b</sup> Rituraj Konwar,<sup>b\*</sup> and Arvind S. Negi<sup>a\*</sup>

<sup>a</sup>*CSIR-Central Institute of Medicinal and Aromatic Plants (CSIR-CIMAP), Kukrail Picnic Spot Road, P.O. CIMAP, Lucknow-226015, India.*

<sup>b</sup>*CSIR-Central Drug Research Institute (CSIR-CDRI), B.S. 10/1, Sector 10, Jankipuram Extension, Sitapur Road, Lucknow-226031, India.*

Spectral data of compounds **13**, **15**, and **19**

Compound **13**:  $^1\text{H}$  NMR

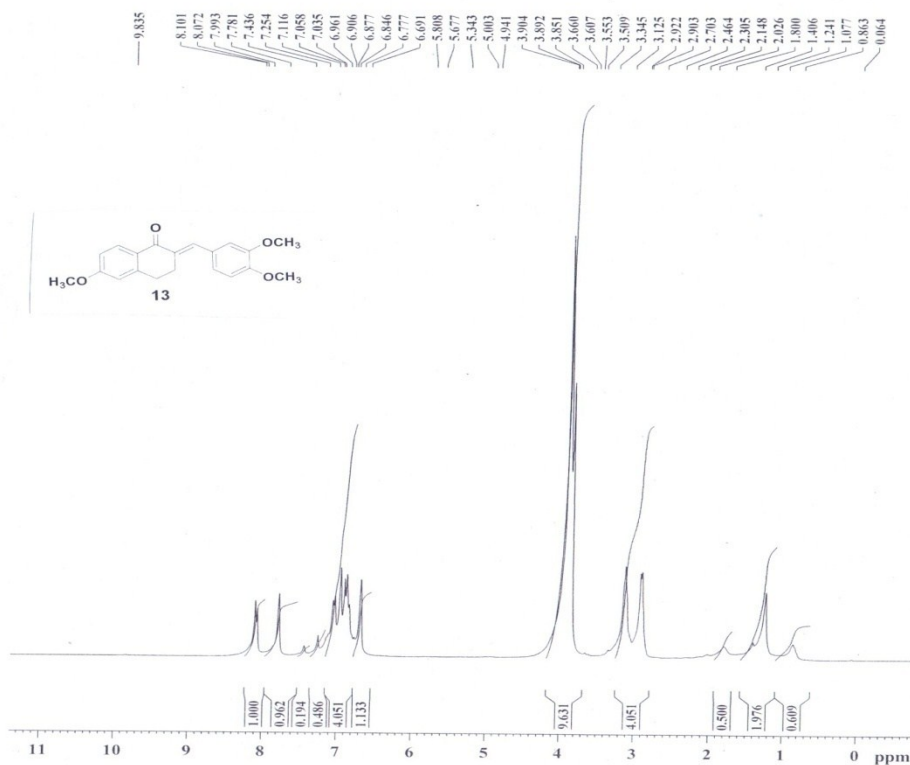

CIMAP PROTON  
PROJECT NO.: mlp-02

Current Data Parameters  
NAME asnjaga.p  
EXPNO 1  
PROCNO 1

F2 - Acquisition Parameters  
Date\_ 20121231  
Time 13.05  
INSTRUM spect  
PROBHD 5 mm Multinucl  
PULPROG zg30  
TD 65536  
SOLVENT CDCl3  
NS 22  
DS 2  
SWH 8992.806 Hz  
FIDRES 0.137219 Hz  
AQ 3.6438515 sec  
RG 114  
DW 55.600 usec  
DE 6.00 usec  
TE 295.6 K  
D1 1.00000000 sec  
TD0 1

===== CHANNEL f1 =====  
NUC1  $^1\text{H}$   
P1 6.85 usec  
PL1 4.00 dB  
SFO1 300.1318534 MHz

F2 - Processing parameters  
SI 32768  
SF 300.1300071 MHz  
WDW EM  
SSB 0  
LB 0.30 Hz  
GB 0  
PC 1.40

Compound **13**:  $^{13}\text{C}$  NMR

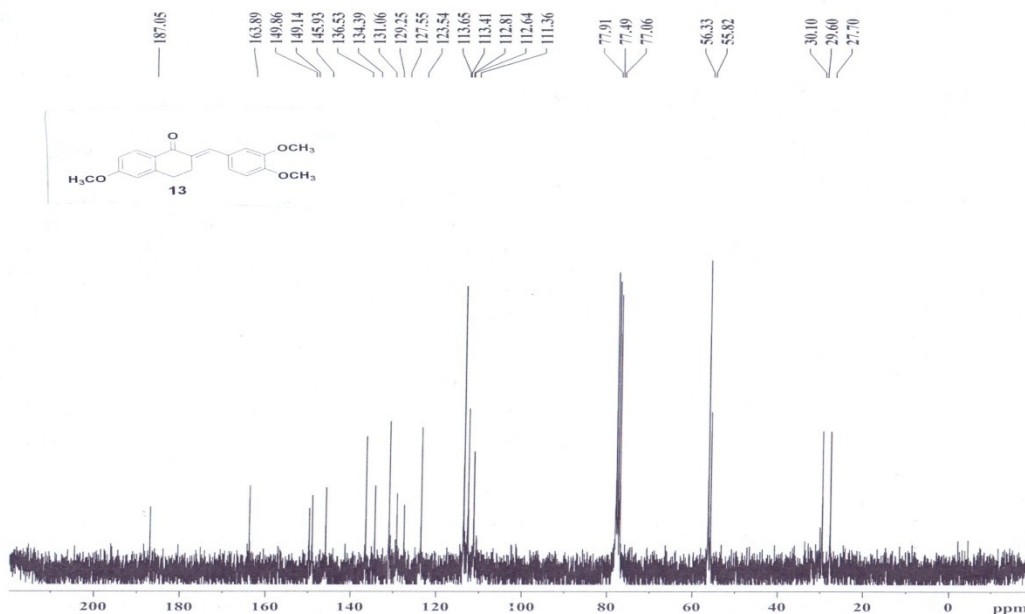

CIMAP - CARBON  
PROJECT NO.: MLP-04

Current Data Parameters  
NAME asnjaga.p  
EXPNO 2  
PROCNO 1

F2 - Acquisition Parameters  
Date\_ 20130109  
Time 16.28  
INSTRUM spect  
PROBHD 5 mm Multinucl  
PULPROG zgpg30  
TD 65536  
SOLVENT CDCl3  
NS 350  
DS 4  
SWH 17985.611 Hz  
FIDRES 0.274439 Hz  
AQ 1.8219508 sec  
RG 32768  
DW 27.800 usec  
DE 6.00 usec  
TE 297.4 K  
D1 2.00000000 sec  
d11 0.03000000 sec  
DELTA 1.89999999 sec  
TD0 1

===== CHANNEL f1 =====  
NUC1  $^{13}\text{C}$   
P1 12.50 usec  
PL1 -6.00 dB  
SFO1 75.4752950 MHz

===== CHANNEL f2 =====  
CPDPRG2 waltz16  
NUC2  $^1\text{H}$   
PCPD2 80.00 usec  
PL2 4.00 dB  
PL12 25.35 dB  
PL13 29.61 dB  
SFO2 300.1312000 MHz

F2 - Processing parameters  
SI 32768  
SF 75.4677190 MHz  
WDW EM  
SSB 0  
LB 1.00 Hz  
GB 0  
PC 1.40

### Compound 13: DEPT-135

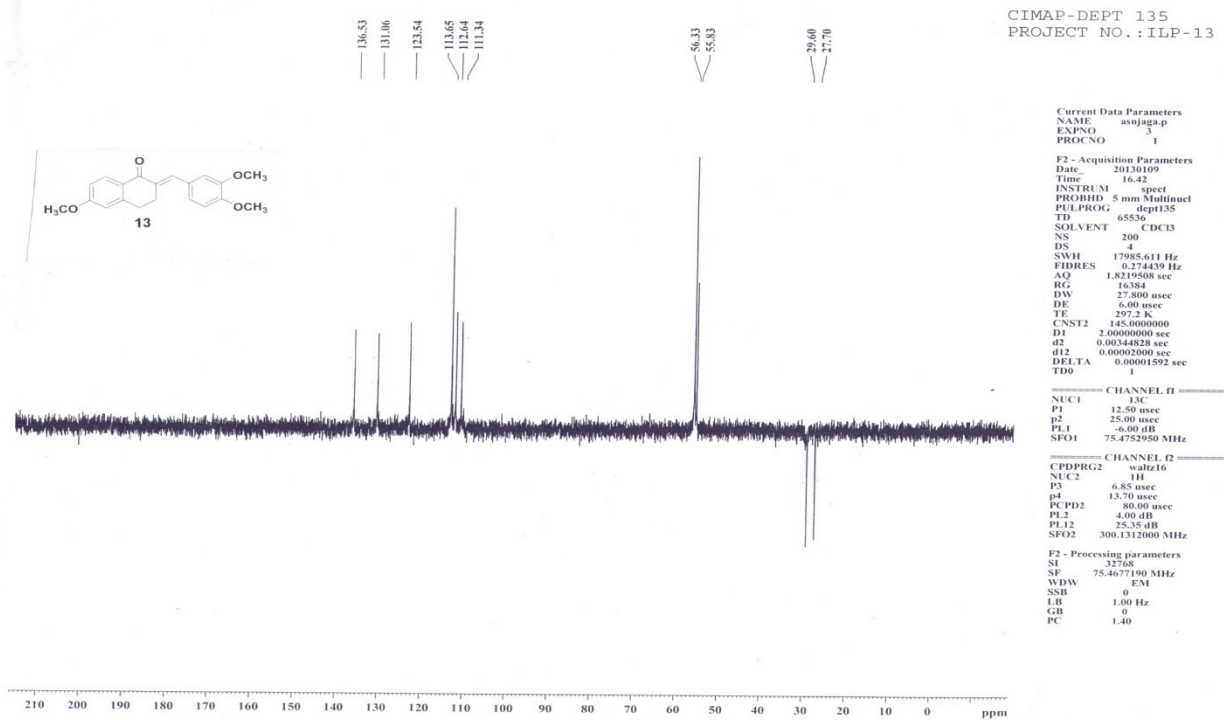

### Compound 13: HRMS

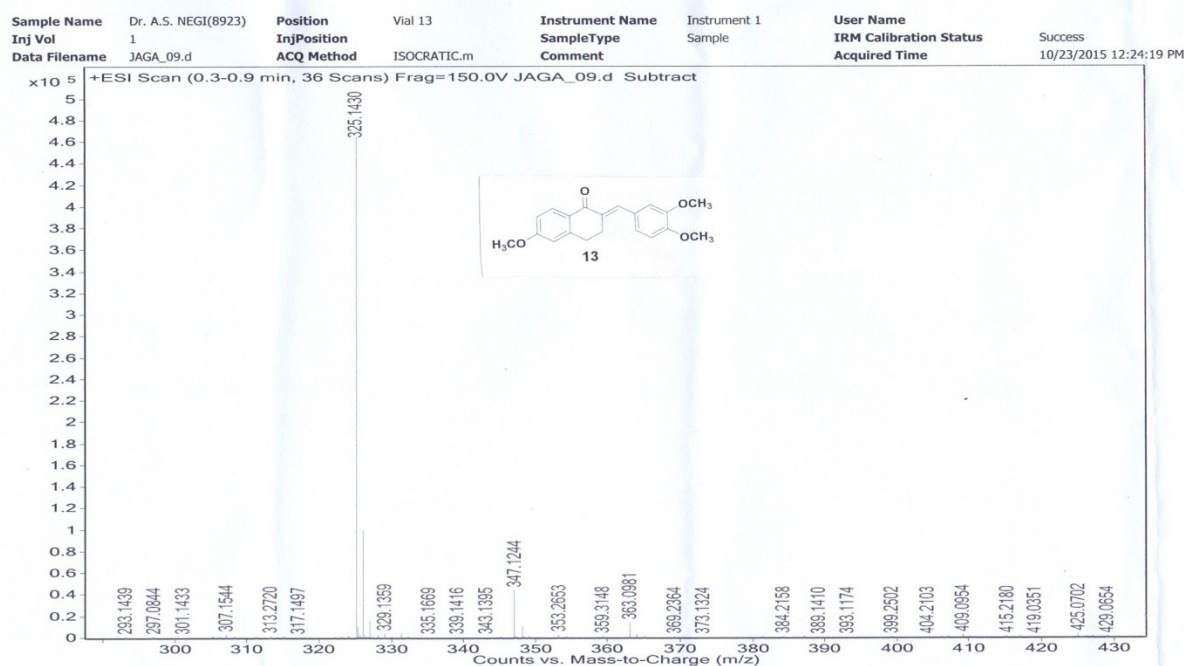

### Compound 15: <sup>1</sup>H NMR

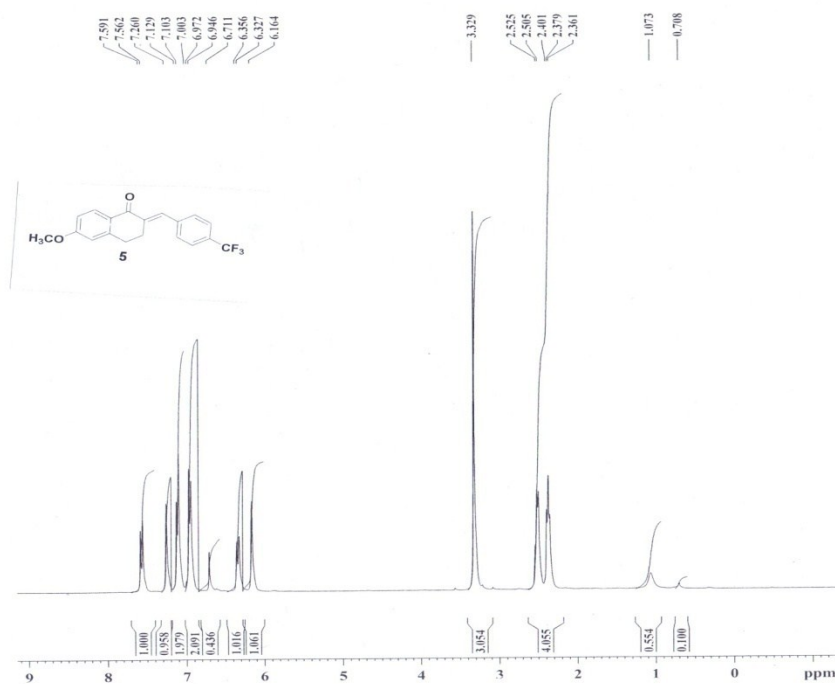

CIMAP-PROTON  
PROJECT NO.: mlp-02

Current Data Parameters  
NAME asnaaa1b.p  
EXPNO 1  
PROCNO 1

F2 - Acquisition Parameters  
Date 20130418  
Time 15.49  
INSTRUM spect  
PROBHD 5 mm Multinucl  
PULPROG zg30  
TD 65536  
SOLVENT CDCl3  
NS 16  
DS 2  
SWH 8992.806 Hz  
FIDRES 0.137219 Hz  
AQ 3.6438515 sec  
RG 287.4  
DW 55.600 usec  
DE 6.00 usec  
TE 300.0 K  
D1 1.00000000 sec  
TD0 1

===== CHANNEL f1 =====  
NUC1 1H  
P1 6.78 usec  
PL1 4.00 dB  
SFO1 300.1318534 MHz

F2 - Processing parameters  
SI 32768  
SF 300.1301713 MHz  
WDW EM  
SSB 0  
LB 0.30 Hz  
GB 0  
PC 1.40

### Compound 15: <sup>13</sup>C NMR

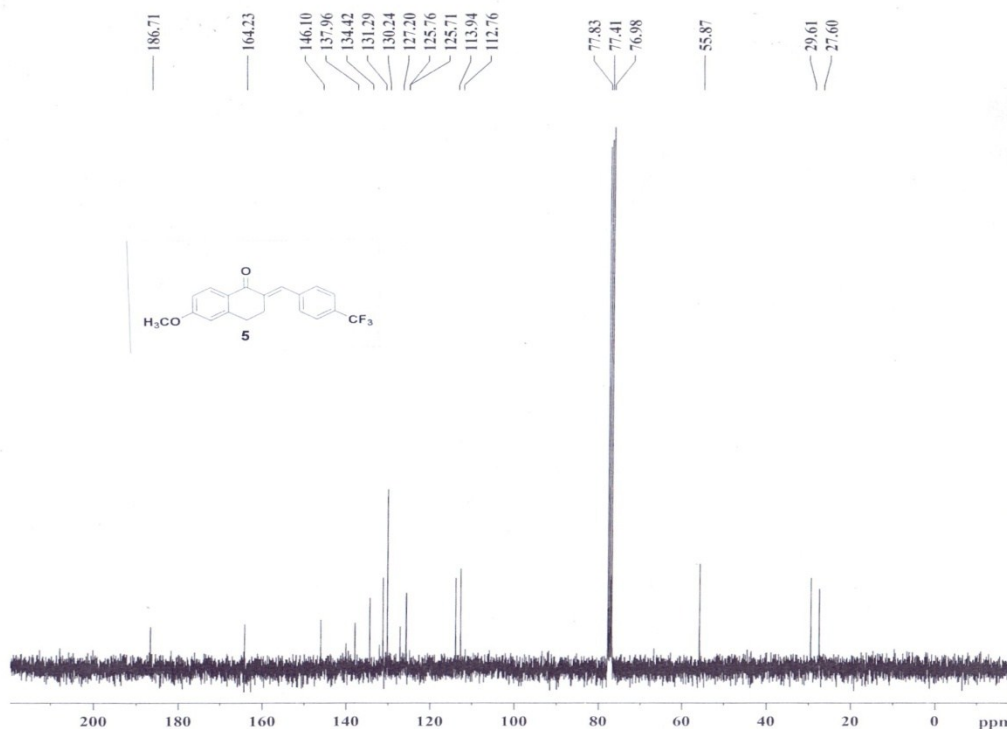

CIMAP-CARBON  
PROJECT NO.: MLP-04

Current Data Parameters  
NAME asnaaa1b.p  
EXPNO 1  
PROCNO 1

F2 - Acquisition Parameters  
Date 20130418  
Time 16.07  
INSTRUM spect  
PROBHD 5 mm Multinucl  
PULPROG zgpg30  
TD 65536  
SOLVENT CDCl3  
NS 387  
DS 4  
SWH 17985.611 Hz  
FIDRES 0.274439 Hz  
AQ 1.8219508 sec  
RG 32768  
DW 27.800 usec  
DE 6.00 usec  
TE 300.6 K  
D1 2.00000000 sec  
d11 0.03000000 sec  
DELTA 1.89999998 sec  
TD0 1

===== CHANNEL f1 =====  
NUC1 13C  
P1 12.60 usec  
PL1 -6.00 dB  
SFO1 75.4752950 MHz

===== CHANNEL f2 =====  
CPDPRG2 waltz16  
NUC2 1H  
PCPD2 80.00 usec  
PL2 4.00 dB  
PL12 25.44 dB  
PL13 29.61 dB  
SFO2 300.1312000 MHz

F2 - Processing parameters  
SI 32768  
SF 75.4677190 MHz  
WDW EM  
SSB 0  
LB 1.00 Hz  
GB 0  
PC 1.40

# Compound 15: DEPT-135

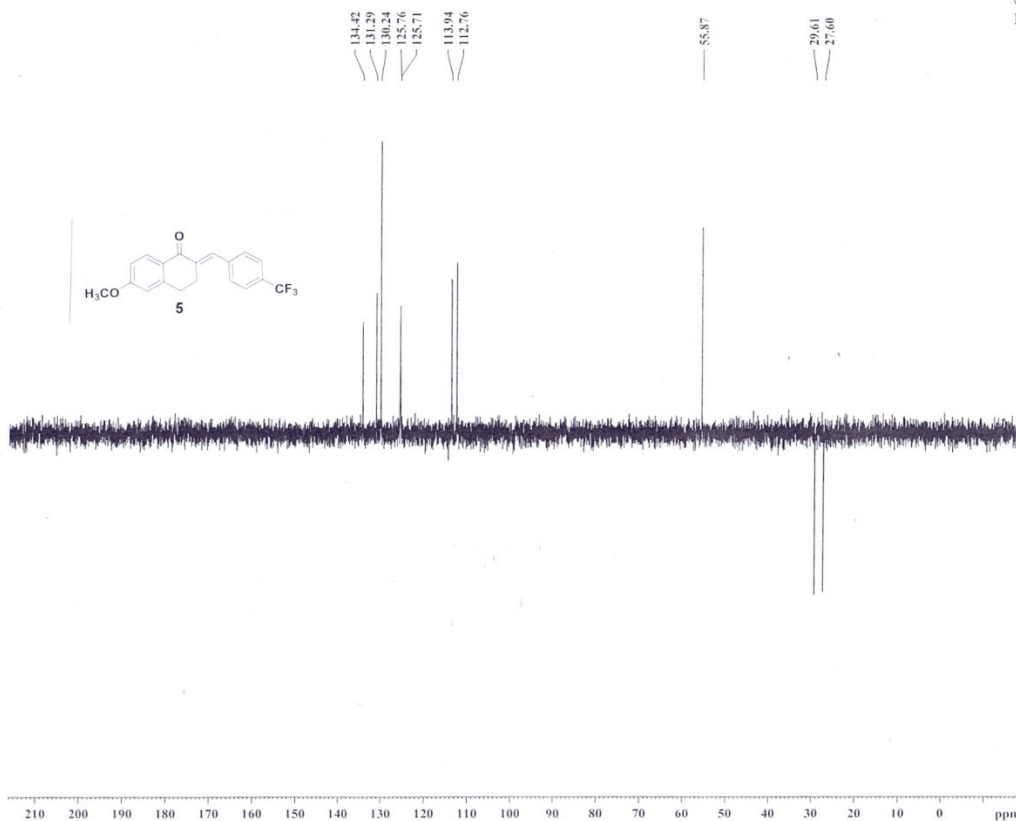

CIMAP-DEPT 135  
PROJECT NO.: ILP-13

Current Data Parameters  
NAME asnaaab.p  
EXPNO 3  
PROCNO 1

F2 - Acquisition Parameters  
Date\_ 20130418  
Time\_ 16.14  
INSTRUM spect  
PROBHD 5 mm Maltmuact  
PULPROG dept135  
TD 65536  
SOLVENT CDCl3  
NS 321  
DS 4  
SWH 17985.611 Hz  
FIDRES 0.274439 Hz  
AQ 1.8219508 sec  
RG 16384  
DW 27.800 usec  
DE 6.00 usec  
TE 300.5 K  
CNST2 145.0000000  
D1 2.00000000 sec  
d2 0.00344828 sec  
d12 0.00002000 sec  
DELTA 0.0001604 sec  
TD0 1

CHANNEL f1  
NUC1 13C  
P1 12.60 usec  
p2 25.20 usec  
PL1 -6.00 dB  
SFO1 75.4752950 MHz

CHANNEL g2  
CPDPRG2 waltz16  
NUC2 1H  
P3 6.78 usec  
pd 13.56 usec  
PCPD2 80.00 usec  
PL2 4.00 dB  
PL12 25.44 dB  
SFO2 300.1312000 MHz

F2 - Processing parameters  
SI 32768  
SF 75.4677190 MHz  
WDW EM  
SSB 0  
LB 1.00 Hz  
GB 0  
PC 1.40

# Compound 15: ESI-Mass

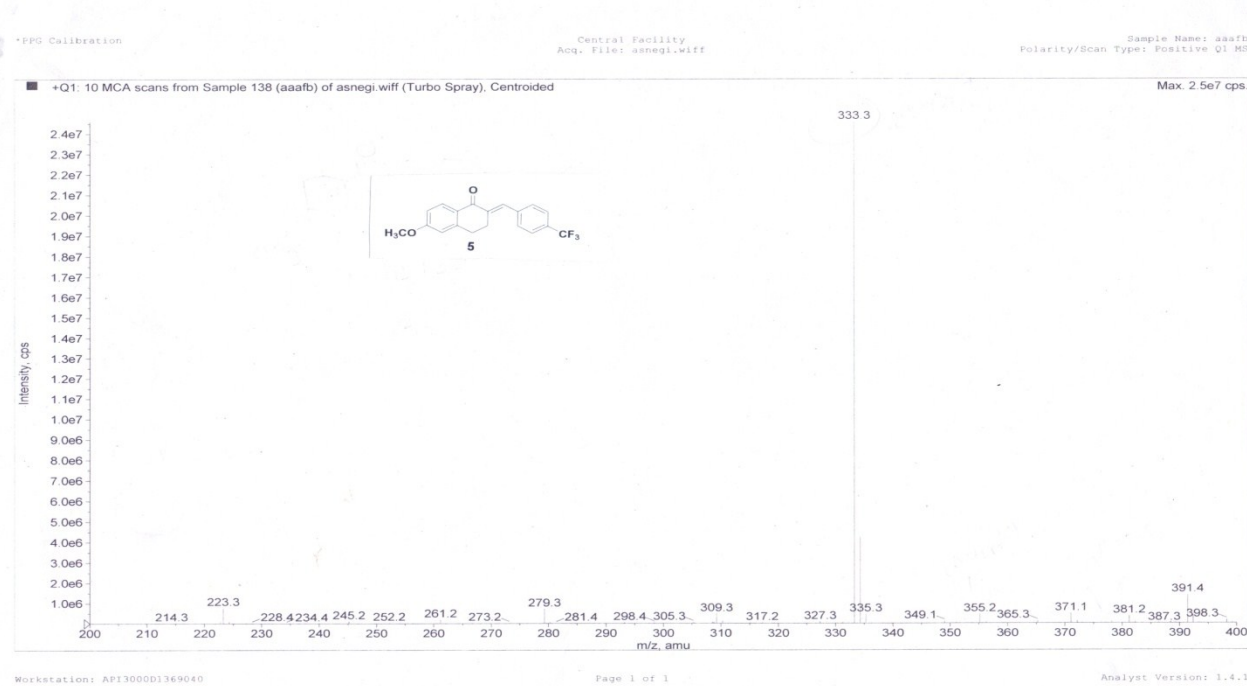

Workstation: API3000D1369040

Page 1 of 1

Analyst Version: 1.4.1

### Compound 19: <sup>1</sup>H NMR

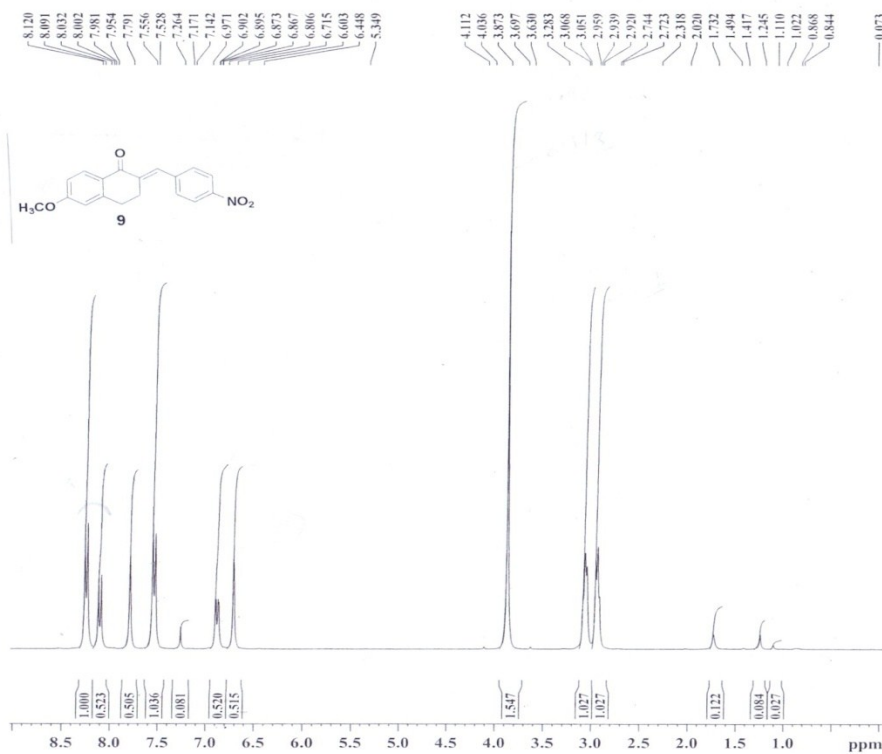

CIMAP-PROTON  
PROJECT NO.: mlp-02

Current Data Parameters  
NAME asbbbbit.p  
EXPNO 1  
PROCNO 1

F2 - Acquisition Parameters  
Date\_ 20130315  
Time 16.04  
INSTRUM spect  
PROBHD 5 mm Multinucl  
PULPROG zg30  
TD 65536  
SOLVENT CDCl3  
NS 16  
DS 2  
SWH 6172.839 Hz  
FIDRES 0.094190 Hz  
AQ 5.308460 sec  
RG 128  
DW 81.000 usec  
DE 6.00 usec  
TE 300.3 K  
D1 1.00000000 sec  
TD0 1

===== CHANNEL f1 =====  
NUC1 1H  
P1 6.78 usec  
PL1 4.00 dB  
SFO1 300.1318534 MHz

F2 - Processing parameters  
SI 32768  
SF 300.1300051 MHz  
WDW EM  
SSB 0  
LB 0.30 Hz  
GB 0  
PC 1.40

### Compound 19: <sup>13</sup>C NMR

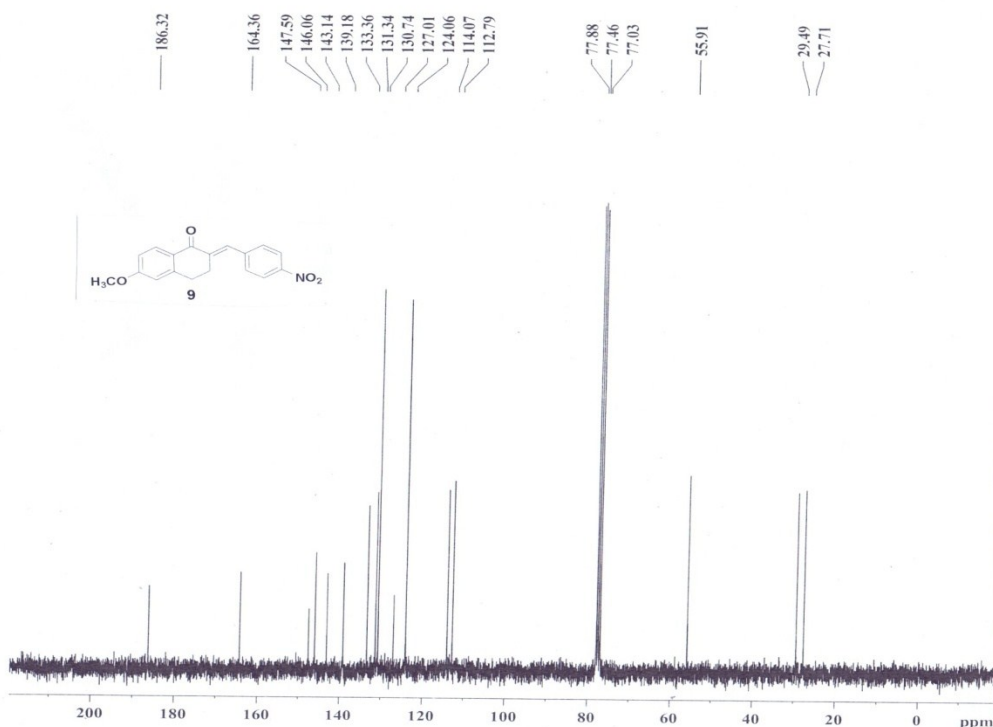

CIMAP-CARBON  
PROJECT NO.: MLP-04

Current Data Parameters  
NAME asbbbbit.p  
EXPNO 2  
PROCNO 1

F2 - Acquisition Parameters  
Date\_ 20130315  
Time 16.05  
INSTRUM spect  
PROBHD 5 mm Multinucl  
PULPROG zgpg30  
TD 65536  
SOLVENT CDCl3  
NS 256  
DS 4  
SWH 17985.611 Hz  
FIDRES 0.274439 Hz  
AQ 1.8219508 sec  
RG 32768  
DW 27.800 usec  
DE 6.00 usec  
TE 300.5 K  
D1 2.00000000 sec  
d11 0.03000000 sec  
DELTA 1.89999998 sec  
TD0 1

===== CHANNEL f1 =====  
NUC1 13C  
P1 12.60 usec  
PL1 6.00 dB  
SFO1 75.4752950 MHz

===== CHANNEL f2 =====  
CPDPRG2 waltz16  
NUC2 1H  
PCPD2 80.00 usec  
PL2 4.00 dB  
PL12 25.44 dB  
PL13 29.61 dB  
SFO2 300.1312000 MHz

F2 - Processing parameters  
SI 32768  
SF 75.4677190 MHz  
WDW EM  
SSB 0  
LB 1.00 Hz  
GB 0  
PC 1.40



# Compound 19: DEPT-135

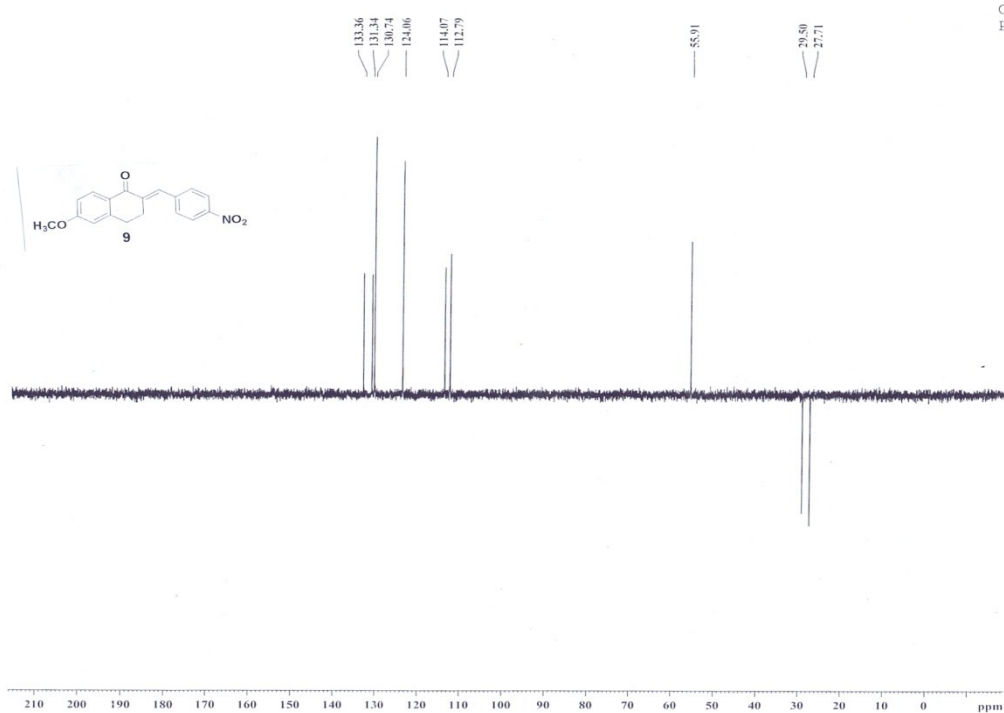

CIMAP-DEPT 135  
PROJECT NO.: ILP-13

Current Data Parameters  
NAME asbbbnit.p  
EXPNO 3  
PROCNO 1

F2 - Acquisition Parameters  
Date\_ 20130315  
Time 16.22  
INSTRUM spect  
PROBHD 5 mm Multinuc  
PULPROG dept135  
TD 65536  
SOLVENT CDCl3  
NS 166  
DS 4  
SWH 17985.611 Hz  
FIDRES 0.274439 Hz  
AQ 1.8219508 sec  
RG 16384  
DW 27.800 usec  
DE 6.00 usec  
TE 300.7 K  
CNST2 145.000000  
D1 2.00000000 sec  
d2 0.00344828 sec  
d12 0.00002000 sec  
DELTA 0.00001604 sec  
TD0 1

CHANNEL f1  
NUC1 13C  
p1 12.60 usec  
p2 25.20 usec  
PL1 -6.00 dB  
SFO1 75.4752950 MHz

CHANNEL f2  
CPDPRG2 waltz16  
NUC2 1H  
P3 6.78 usec  
p4 13.56 usec  
PCPD2 80.00 usec  
PI2 4.00 dB  
PL12 25.44 dB  
SFO2 300.1312000 MHz

F2 - Processing parameters  
SI 32768  
SF 75.4677190 MHz  
WDW EM  
SSB 0  
LB 1.00 Hz  
GB 1.40  
PC 1.40

# Compound 19: ESI-Mass

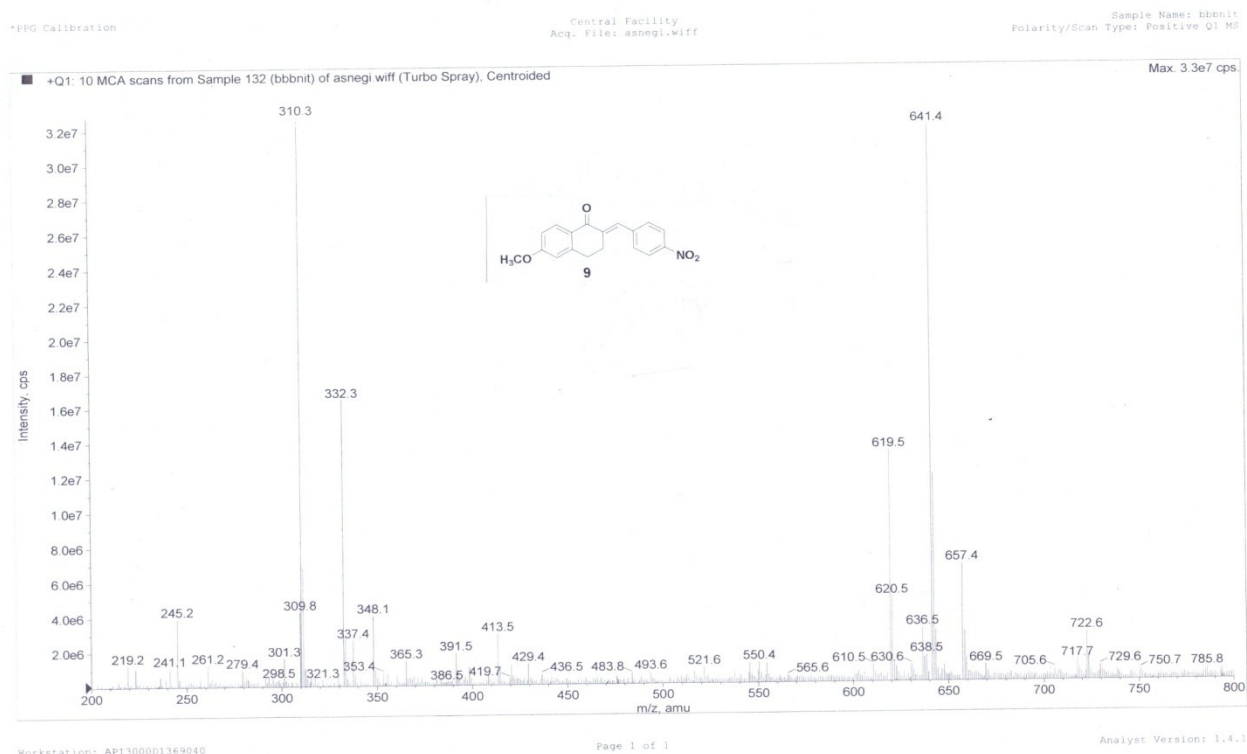

Workstation: API3000D1369040

Page 1 of 1

Analyst Version: 1.4.1
